# Supplementary material
Source: publisher figshare collection journal article supplement (https://acs.figshare.com/ndownloader/files/24636535)
Supplement: Supplementary file 1 [file 24636535]

# **Ether-linked diamine carboxylate ionic liquid aqueous solution for efficient absorption of SO<sub>2</sub>**

Bin Jiang<sup>†</sup>, Shuai Hou<sup>†</sup>, Luhong Zhang<sup>†</sup>, Na Yang<sup>†</sup>, Na Zhang<sup>†</sup>, Xiaoming Xiao<sup>†</sup>,

Xiaodong Yang<sup>†</sup> Yongli Sun<sup>†</sup>, Xiaowei Tantai<sup>\*†</sup>

<sup>†</sup>School of Chemical Engineering and Technology, Tianjin University, Tianjin 300072, P. R.  
China

---

<sup>\*</sup>Corresponding author: Xiaowei Tantai. *E-mail addresses:* tantaixw@tju.edu.cn (Xiaowei Tantai), Tel/Fax: +86 22 27400199, School of Chemical Engineering and Technology, Tianjin University, Tianjin 300072, P. R. China.

### <sup>1</sup>H NMR data of EDPIILs:

[BDMAEE][L] <sup>1</sup>H NMR (500 MHz, DMSO, 298.2K, TMS),  $\delta$  (ppm) :

1.31(3H, m), 2.61(12H, t), 3.63(4H, t), 3.91(4H, t), 4.21(1H, s), 4.82(1H, s),  
7.81(1H,s)

[BDMAEE][L]<sub>2</sub> <sup>1</sup>H NMR (500 MHz, DMSO, 298.2K, TMS),  $\delta$  (ppm) : 1.31(6H, m),

2.61(12H, t), 3.63(4H, m), 3.91(4H, m), 4.21(2H, s), 4.82(2H, s), 7.81(2H,s)

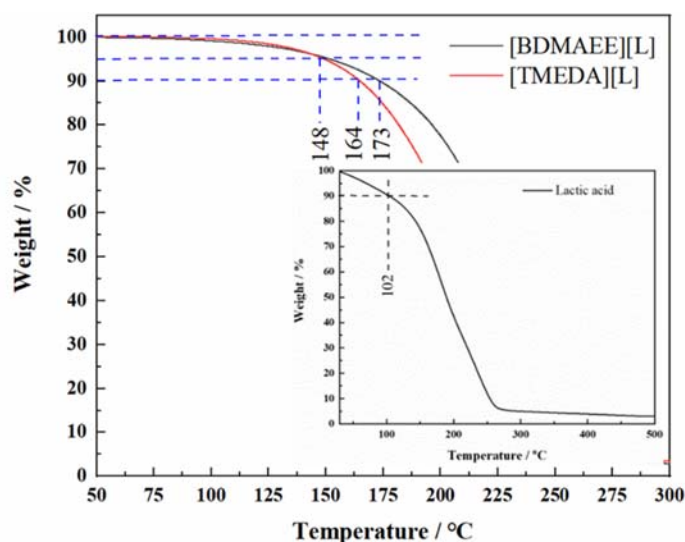

**Figure S1.** TGA curves of [BDMAEE][L], [TMEDA][L] and lactic acid with a 10 °C/min temperature heating rate to 800 °C under the N<sub>2</sub> atmosphere.

We employed a lactic acid of 99.7% purity and 85% content. We further decreased the water content below 6 wt% via evaporation under vacuum before thermal gravimetric analysis was carried out. It was evident that the weight loss before 100 °C was approximately 10 wt%, this may suggest the relatively poor thermal stability of the lactate anion.

**Table S1.** The water content of the prepared PILs.

| PILs       | Water contents ( wt% ) |
|------------|------------------------|
| [TMEDA][L] | 0.1030±0.0075          |

|                          |               |
|--------------------------|---------------|
| [TMEDA][L] <sub>2</sub>  | 0.1244±0.0050 |
| [BDMAEE][L]              | 0.1156±0.0085 |
| [BDMAEE][L] <sub>2</sub> | 0.1458±0.0060 |

**Quantum chemical calculations.** The geometries of the SO<sub>2</sub>, BDMAEE, TMEDA, and lactic acid were constructed using GaussView 5.0. To investigate the interaction between PILs and SO<sub>2</sub>, SO<sub>2</sub> molecules were added to [BDMAEE][L] or [TMEDA][L] and optimized to obtain the initial structures of PILs-nSO<sub>2</sub> complexes using Molclus software and Gaussian 09 program. Specifically, 500 initial structures of the PILs-nSO<sub>2</sub> complexes were randomly and irregularly engendered using the Genmer tool of the Molclus program. They were then pre-optimized at the PM6 level by using Gaussian 09 program. According to the energy sequence and previous study, several optimized configurations were selected for further density-functional theory (DFT) calculations. Widely used, B3LYP/6-311+G(d,p) computational model was used to conduct all the DFT calculations. Frequency calculations were carried out at the same theoretical level for each optimized complex structures to confirm there was no imaginary frequency. Thus, all the configurations were verified to be local minima. The interaction energy including the basis set superposition errors (BSSE) was determined using the counterpoise method.

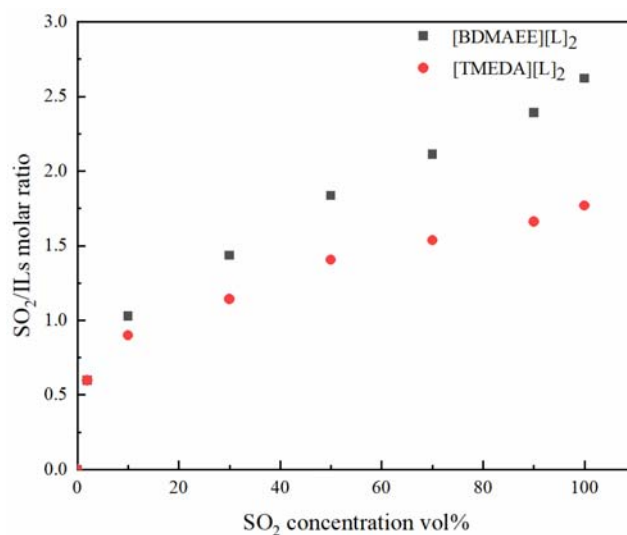

**Figure S2.** Absorption capacity of SO<sub>2</sub> in [BDMAEE][L]<sub>2</sub> and [TMEDA][L]<sub>2</sub> with respect to the concentration of SO<sub>2</sub> at 40 °C.

**Table S2.** The reaction equilibrium constant (K) and related SO<sub>2</sub> absorption experiments data for the absorption enthalpy calculation. (The SO<sub>2</sub> concentration was 100% and the pressure was 1 bar)

| [BDMAEE][L] <sub>2</sub> |                       |        | [TMEDA][L] <sub>2</sub> |                       |        |
|--------------------------|-----------------------|--------|-------------------------|-----------------------|--------|
| T (°C)                   | Capacity<br>(mol/mol) | K      | T (°C)                  | Capacity<br>(mol/mol) | K      |
| 20                       | 2.921                 | 37.119 | 20                      | 1.925                 | 25.667 |
| 30                       | 2.854                 | 19.548 | 30                      | 1.864                 | 13.706 |
| 40                       | 2.621                 | 6.916  | 40                      | 1.768                 | 7.621  |
| 50                       | 1.948                 | 1.853  | 50                      | 1.690                 | 5.445  |
| 60                       | 1.640                 | 1.206  | 60                      | 1.492                 | 2.937  |

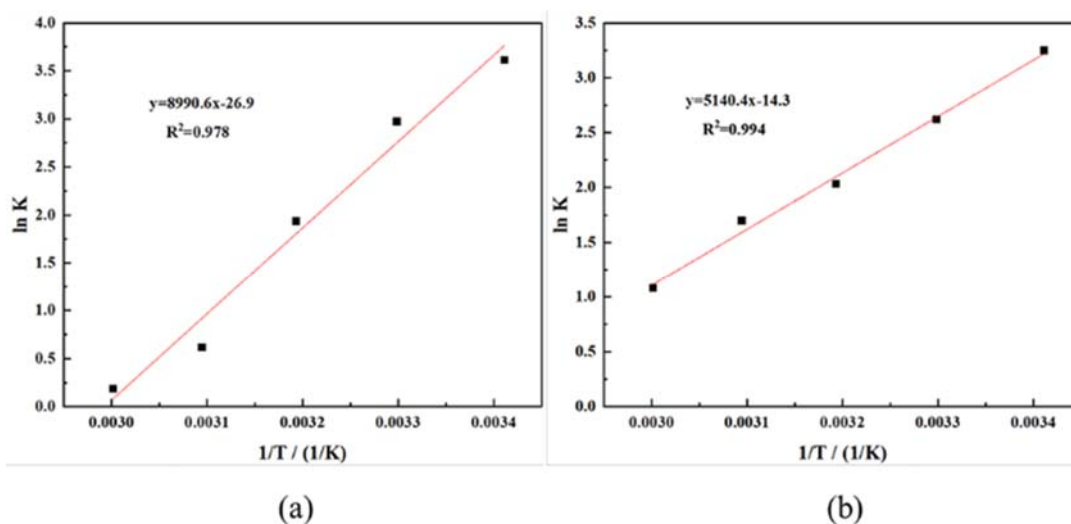

**Figure S3.** The linear relationship between  $\ln K$  and  $1/T$  for (a)  $[BDMAEE][L]_2$  and (b)  $[TMEDA][L]_2$ .

**Physical properties of absorbents.** The densities and viscosities of EDPIILs aq at 25 °C are listed in Table S2. The properties of the prepared absorbents increased with an increase in lactic acid/diamine ratios and the EDPIILs concentrations. Moreover, the viscosities of all studied absorbents ranged from 1.20-6.58 cP, which were significantly lower than those of pure ILs. This indicated that the viscosities of the absorbents could be dramatically decreased via blending EDPIILs with water. Conventionally, low viscosities improved the efficiency of heat and mass transfer. Thus it can be deduced that the studied absorbents with low viscosities may have a practical commercial application.

**Table S3.** Densities and Viscosities of the studied absorbents (25 °C).

| ILs aqueous solution | Concentration | Density(g/cm <sup>3</sup> ) | Viscosity(cP) |
|----------------------|---------------|-----------------------------|---------------|
| $[BDMAEE][L]$ (1:2)  | 19.6 wt% ILs  | 1.0376                      | 1.20          |
| $[BDMAEE][L]$ (1:2)  | 30.1 wt% ILs  | 1.0557                      | 1.28          |

|                   |              |        |      |
|-------------------|--------------|--------|------|
| [BDMAEE][L] (1:2) | 39.9 wt% ILs | 1.0738 | 1.76 |
| [BDMAEE][L] (1:2) | 49.8 wt% ILs | 1.1235 | 2.86 |
| [BDMAEE][L] (1:2) | 60.3 wt% ILs | 1.1348 | 6.58 |

**Table S4.** the SO<sub>2</sub>/CO<sub>2</sub> selectivity of [BDMAEE][L]<sub>2</sub> aqueous solution (50 wt%)

| ILs aqueous solution        | mol SO <sub>2</sub> / mol IL |           | mol CO <sub>2</sub> / mol IL | SO <sub>2</sub> / CO <sub>2</sub> selectivity |                  |
|-----------------------------|------------------------------|-----------|------------------------------|-----------------------------------------------|------------------|
|                             | 2 vol %                      | 100 vol % | 100 vol %                    | S <sub>0.2/1</sub>                            | S <sub>1/1</sub> |
| [BDMAEE][L] <sub>2</sub> aq | 1.040                        | 2.815     | 0.183                        | 5.7                                           | 15.4             |

S<sub>0.2/1</sub>: the molar absorption capacity ratio of 0.2 vol% SO<sub>2</sub> and 100 vol% CO<sub>2</sub> S<sub>1/1</sub>: the molar absorption capacity ratio of 100 vol% SO<sub>2</sub> and 100 vol% CO<sub>2</sub>

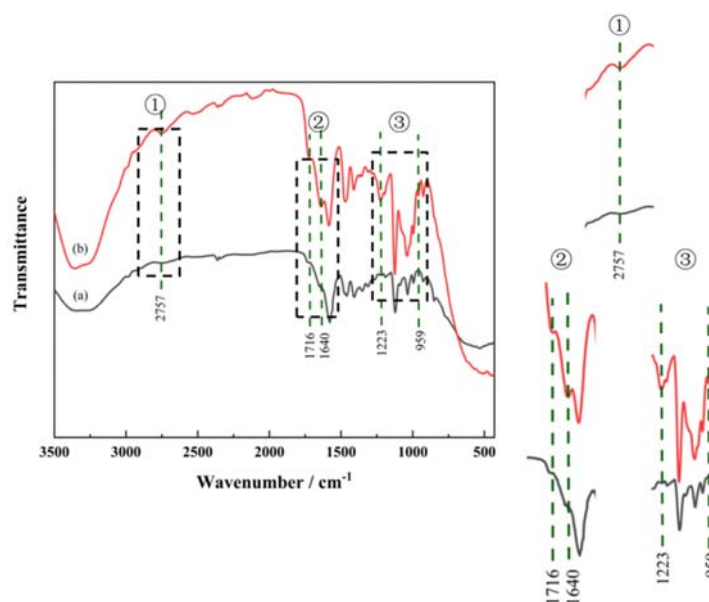

**Figure S4.** FTIR spectra in detail of 50 wt% [BDMAEE][L]<sub>2</sub> aq before (a) and after (b) absorption of SO<sub>2</sub>.
